# Supplementary material for: Silica nanoparticles and kaolin clay decorated with VO2+ in aerobic oxidative destruction of BTEX contaminants
Source: Royal Society of Chemistry journal article supplement (doi:10.1039/d3cp04218a), 2023-12-21
Supplement: d3cp04218a1.pdf [file d3cp04218a1.pdf]

# Aerobic and totally selective oxidative destruction of BTEX contaminants using $\text{VO}^{2+}$ decorated silica nanoparticles and Kaolin powder

Pegah Mohammadpour, Elham Safaei\*

## 1. Characterization of catalyst

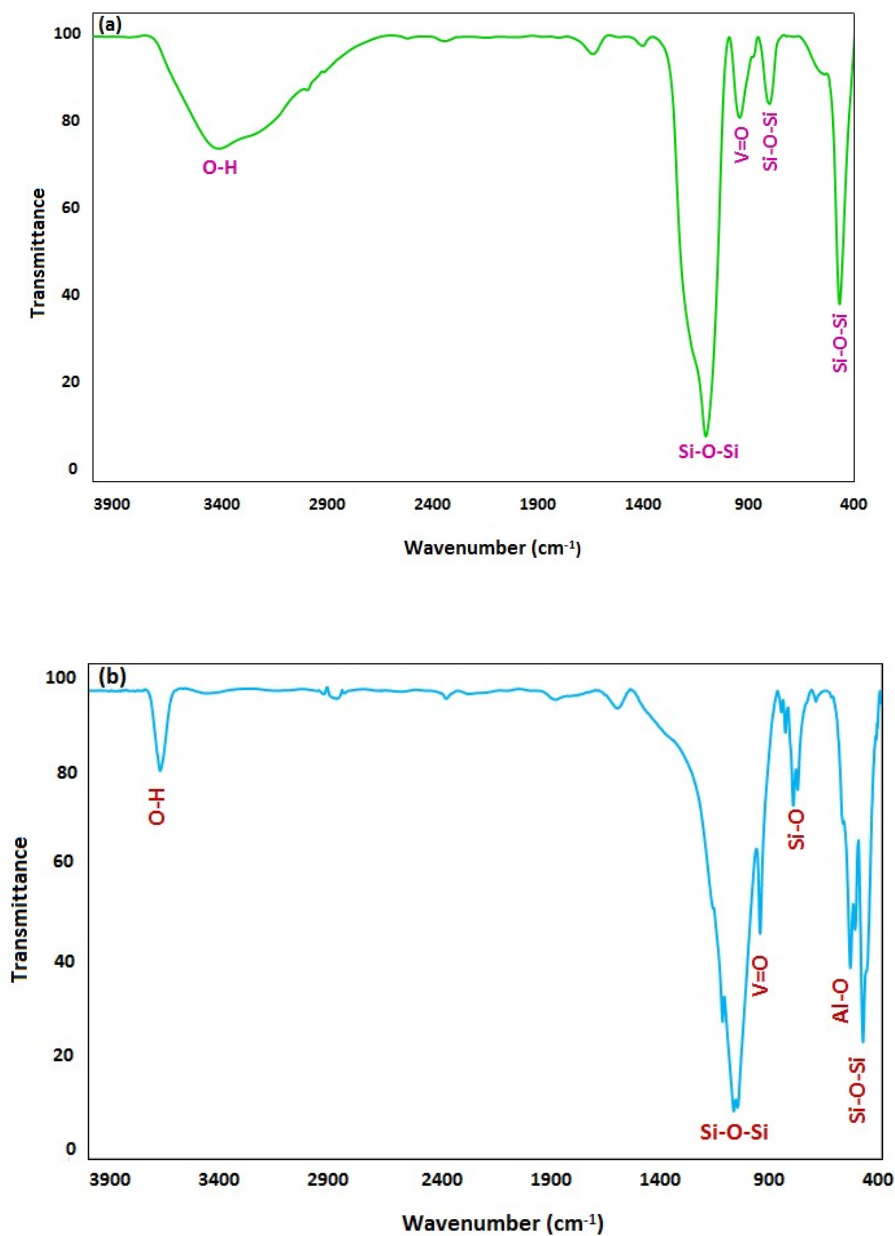

**Figure S1:** FTIR spectra of VO-SNP (a) and VO-Kaolin (b).

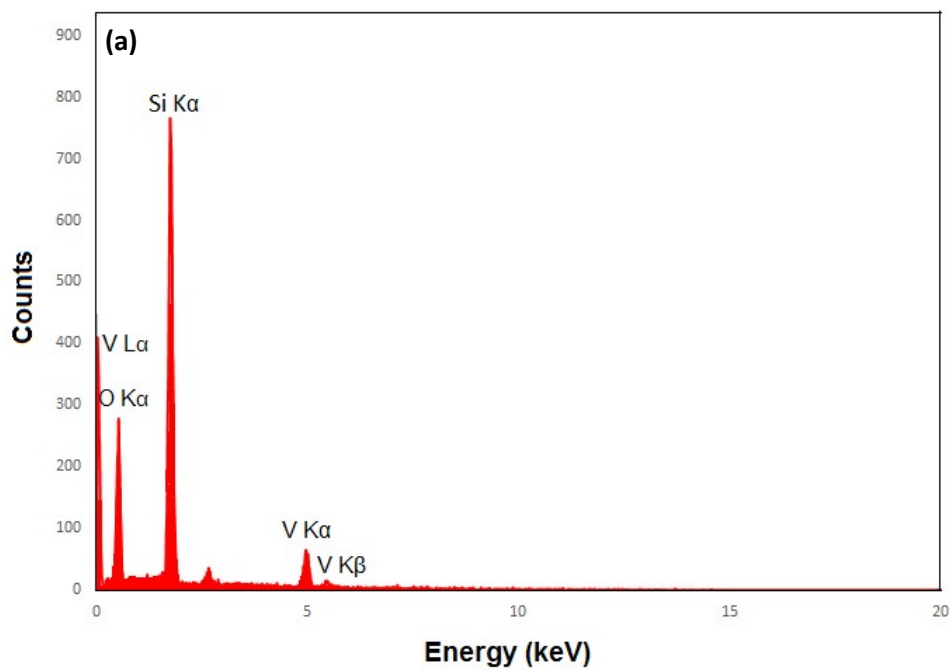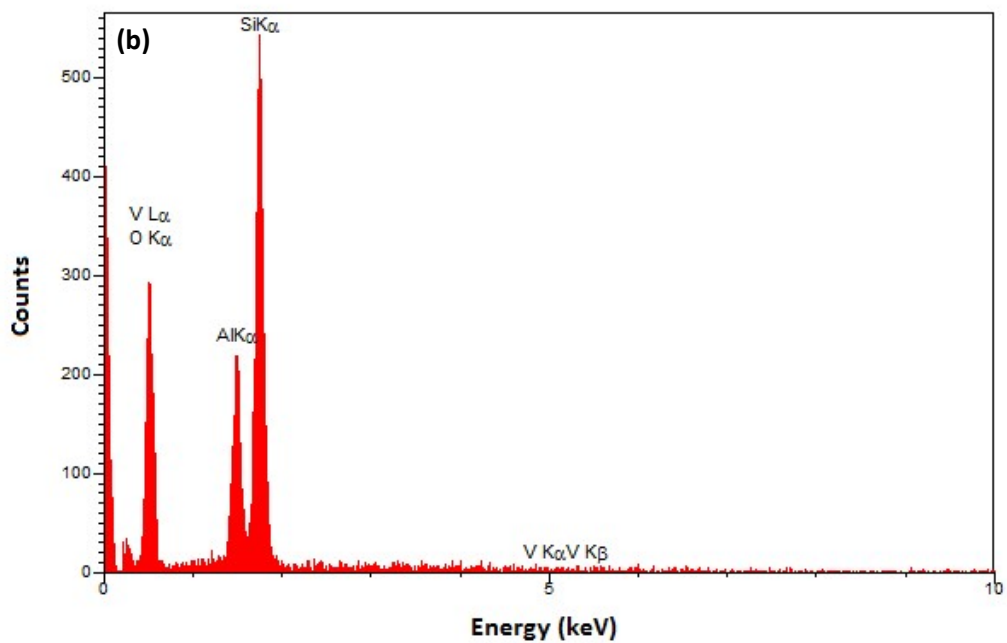

**Figure S2:** Energy-dispersive X-ray spectroscopy of VO-SNP (a) and VO-Kaolin (b).

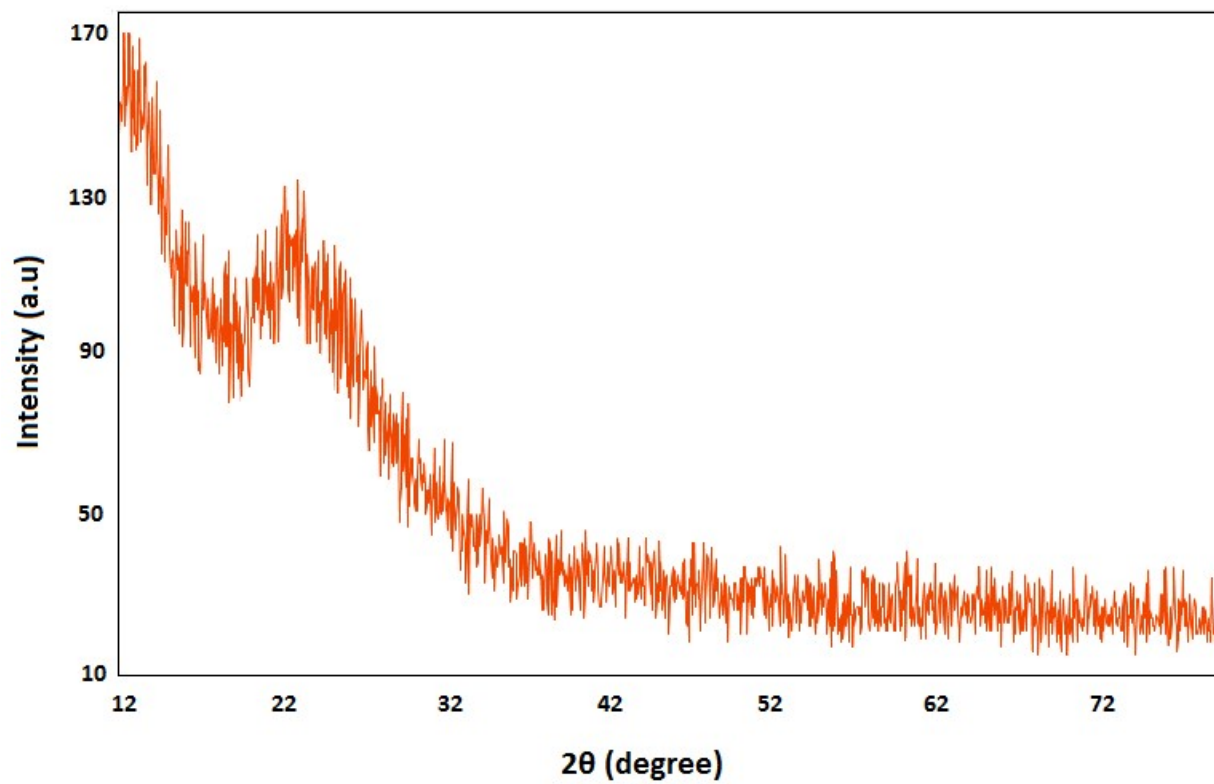

**Figure S3:** X-ray diffraction pattern of VO-SNP.

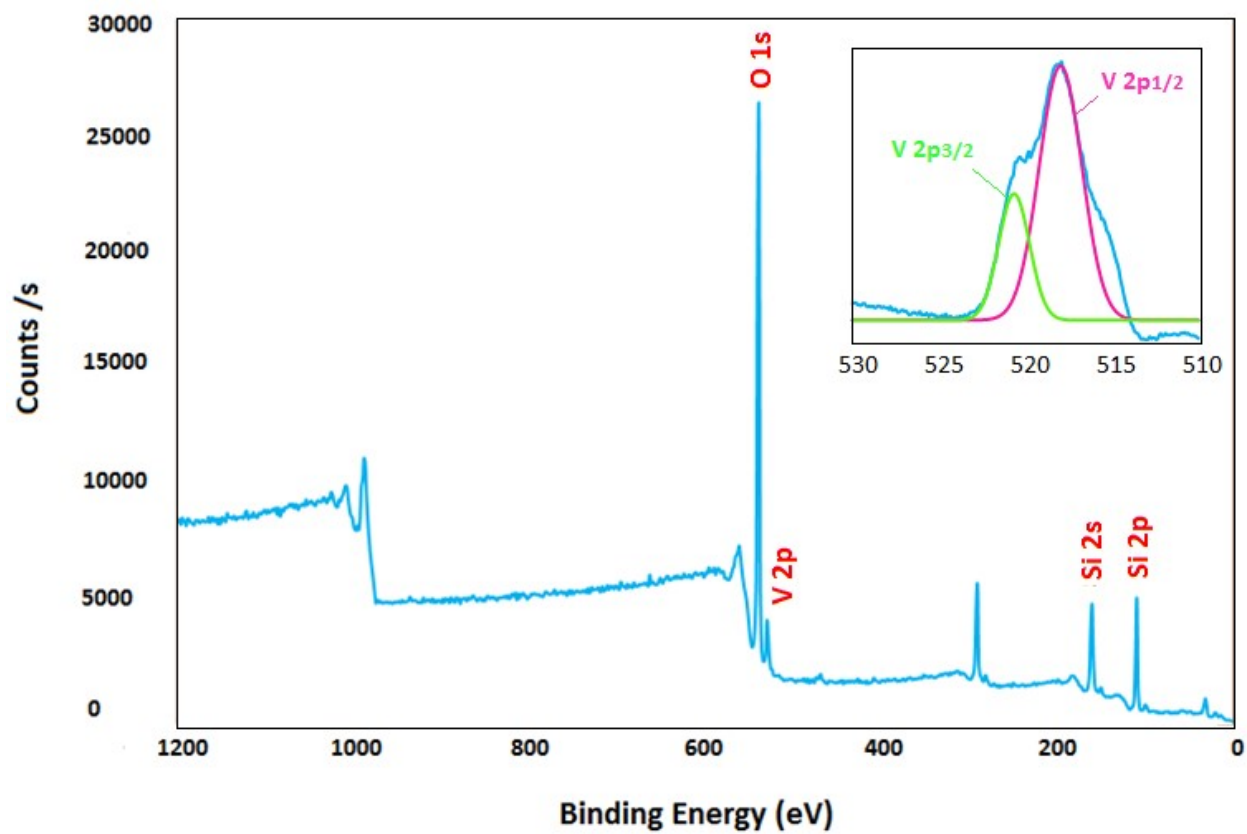

**Figure S4:** The X-ray photoelectron spectroscopy (XPS) spectrum of VO-SNP and curve fitting of V2p.

## 2. $^1\text{H}$ NMR spectrum of products

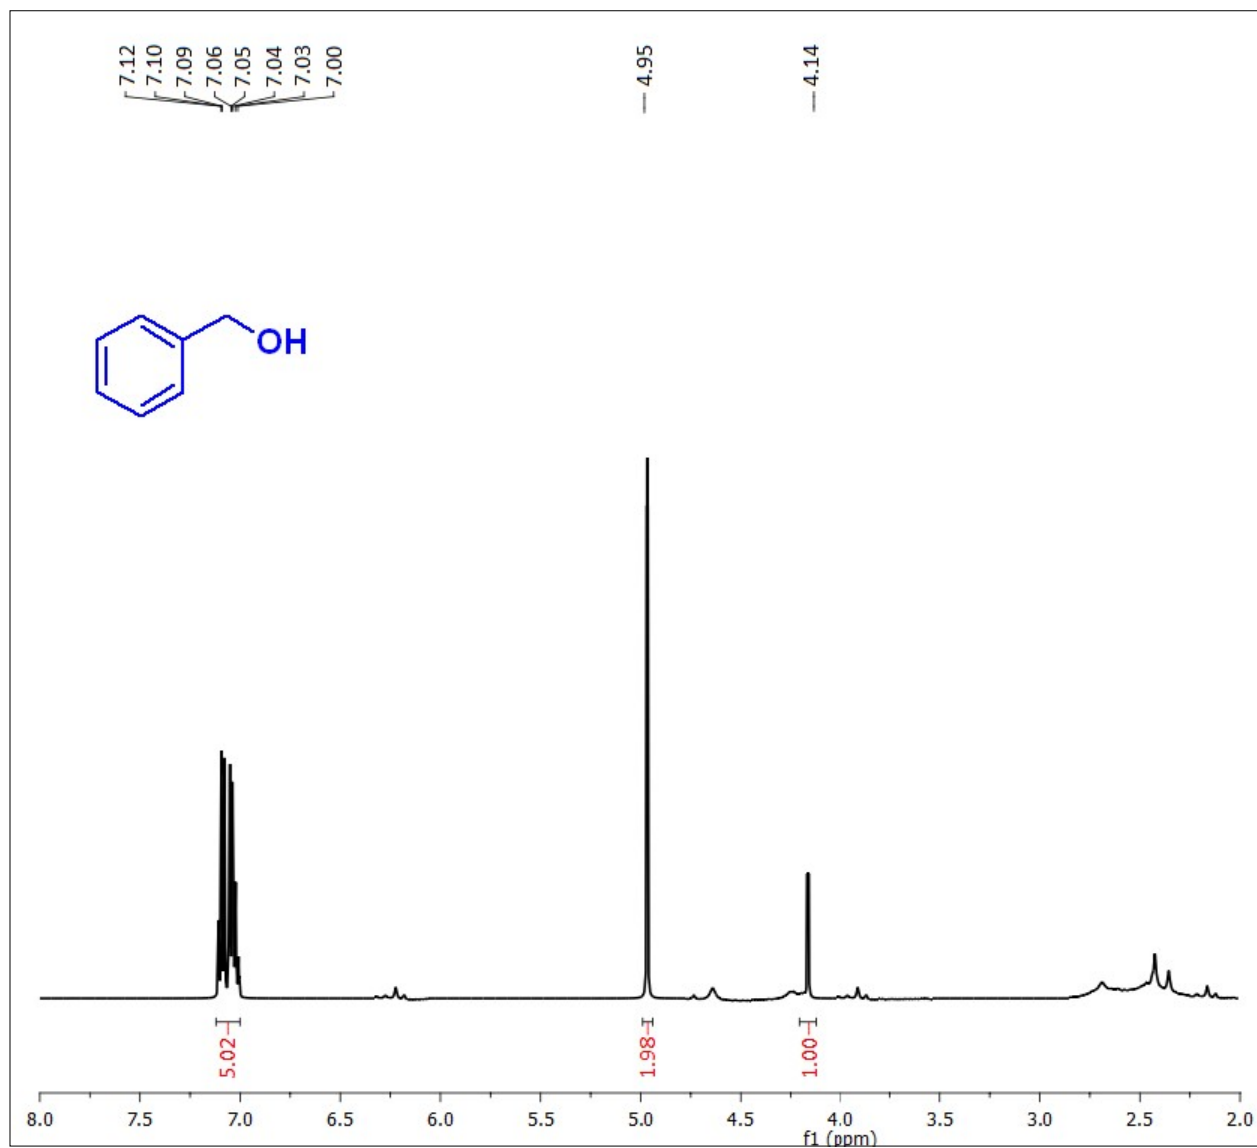

**Figure S5:** The  $^1\text{H}$  NMR spectrum of benzyl alcohol in  $\text{CDCl}_3$ .

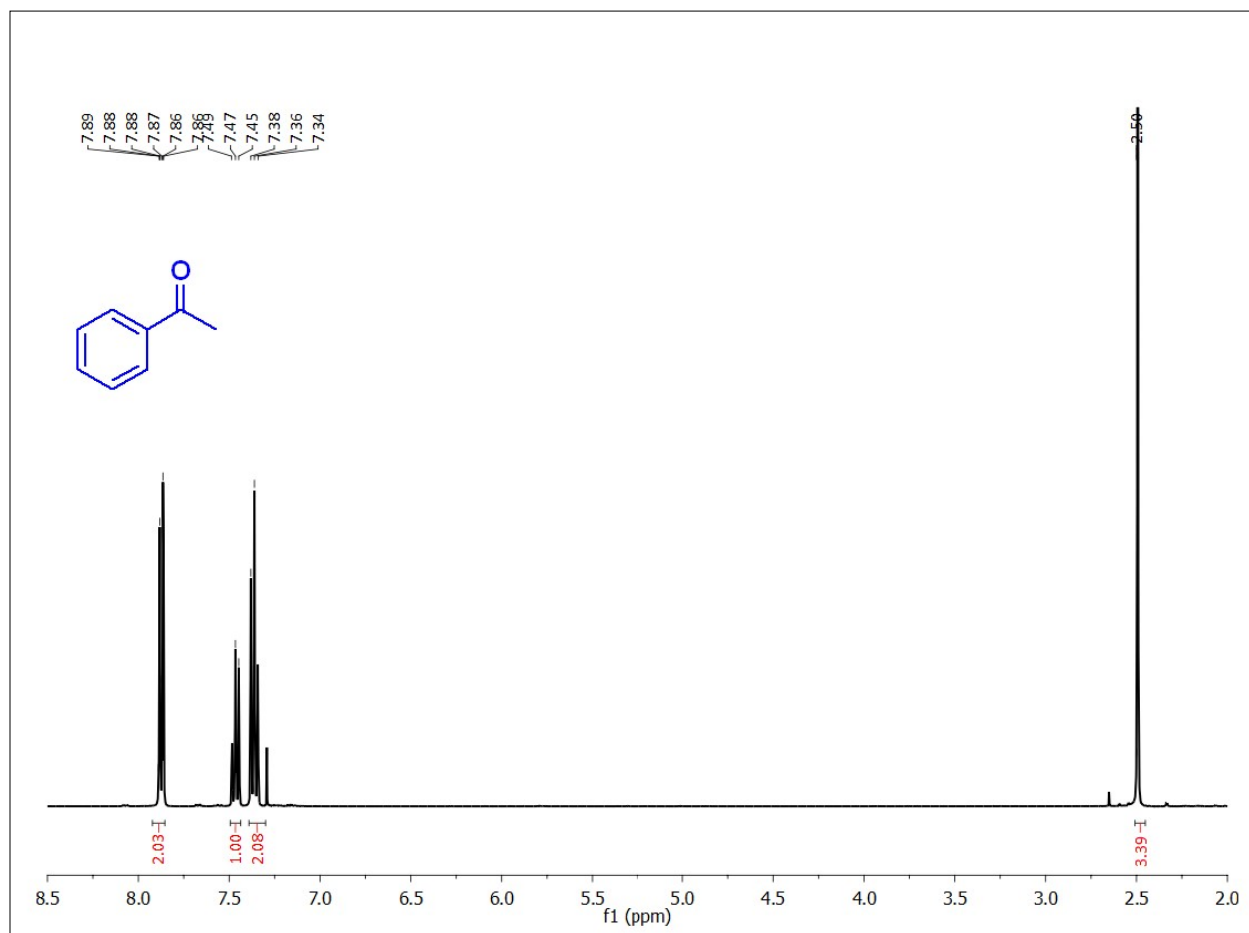

**Figure S6:** The  $^1\text{H}$  NMR spectrum of acetophenone in  $\text{CDCl}_3$ .

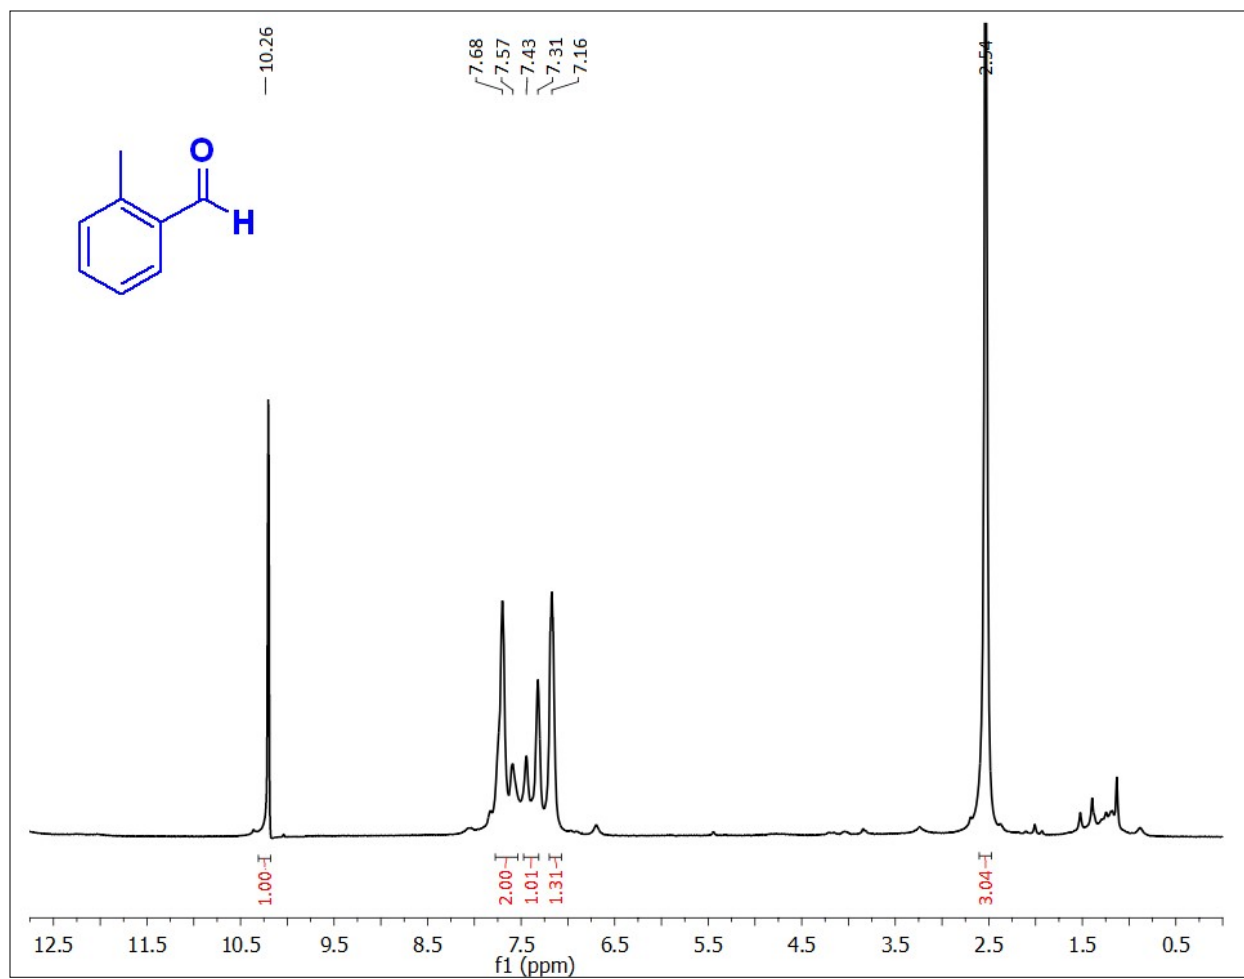

**Figure S7:** The  $^1\text{H}$  NMR spectrum of 2-Methylbenzaldehyde in  $\text{CDCl}_3$ .

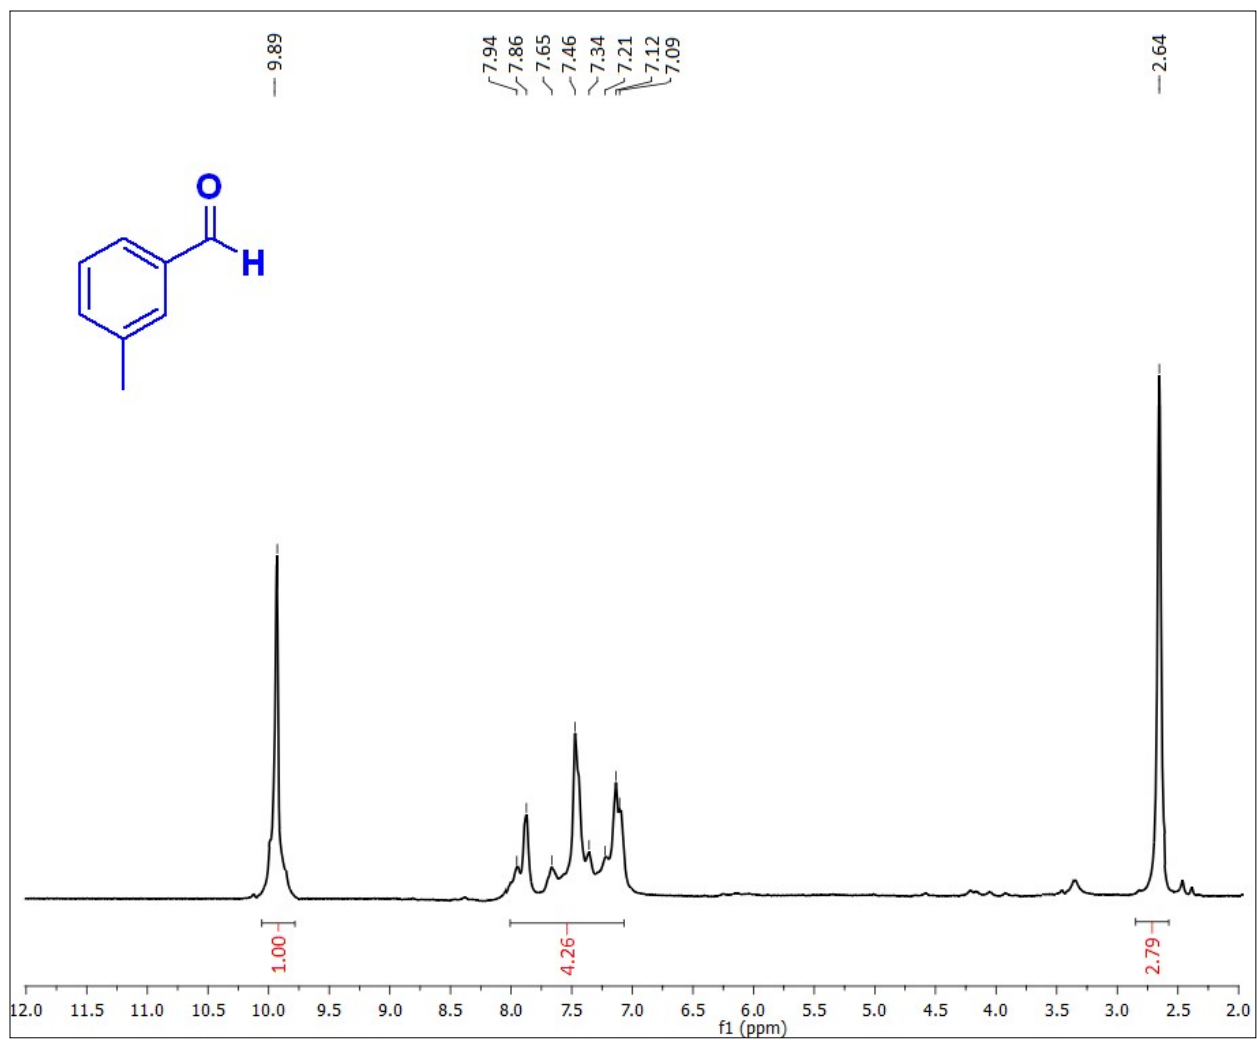

**Figure S8:** The  $^1\text{H}$  NMR spectrum of 3-Methylbenzaldehyde in  $\text{CDCl}_3$ .



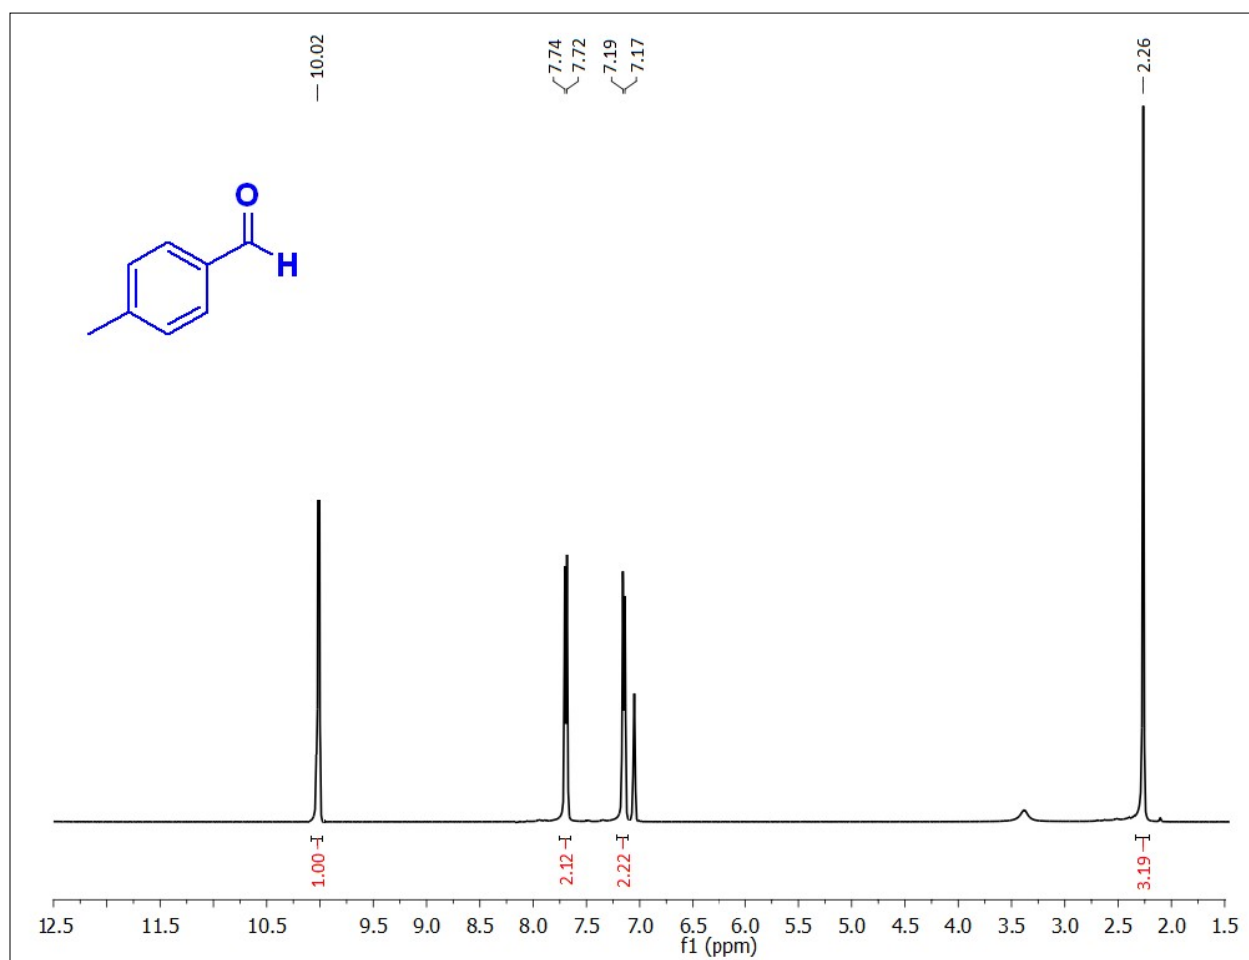

**Figure S9:** The  $^1\text{H}$  NMR spectrum of 4-Methylbenzaldehyde in  $\text{CDCl}_3$ .
